# Supplementary material for: Porous carbon derived from rice husks as sustainable bioresources: insights into the role of micro-/mesoporous hierarchy in hosting active species for lithium–sulphur batteries
Source: Royal Society of Chemistry journal article supplement (doi:10.1039/c6gc00612d), 2016-01-01
Supplement: c6gc00612d1.pdf [file c6gc00612d1.pdf]

**Porous carbon derived from rice husks as sustainable bioresources: insights into the role of micro-/mesoporous hierarchy in hosting active species for lithium–sulphur batteries†‡**

Maria K. Rybarczyk,<sup>§a,c</sup> Hong-Jie Peng,<sup>§b</sup> Cheng Tang,<sup>§b,c</sup> Marek Lieder,<sup>a</sup> Qiang Zhang<sup>\*b,c</sup> and Maria-Magdalena Titirici<sup>\*c</sup>

<sup>a</sup> Chemical Faculty, Department of Chemical Technology, Gdansk University of Technology, 11/12 Narutowicza Str., 80-233 Gdansk, Poland

<sup>b</sup> Beijing Key Laboratory of Green Chemical Reaction Engineering and Technology, Department of Chemical Engineering, Tsinghua University, Beijing 100084, P. R. China. E-mail: [zhang-qiang@mails.tsinghua.edu.cn](mailto:zhang-qiang@mails.tsinghua.edu.cn)

<sup>c</sup> School of Engineering and Materials Science & Materials Research Institute, Queen Mary University of London, Mile End Road, London, E1 4NS, UK. E-mail: [m.m.titirici@qmul.ac.uk](mailto:m.m.titirici@qmul.ac.uk)

†Dedicated to Professor James Clark on occasion of his 65th birthday.

§These authors contributed equally to this work.

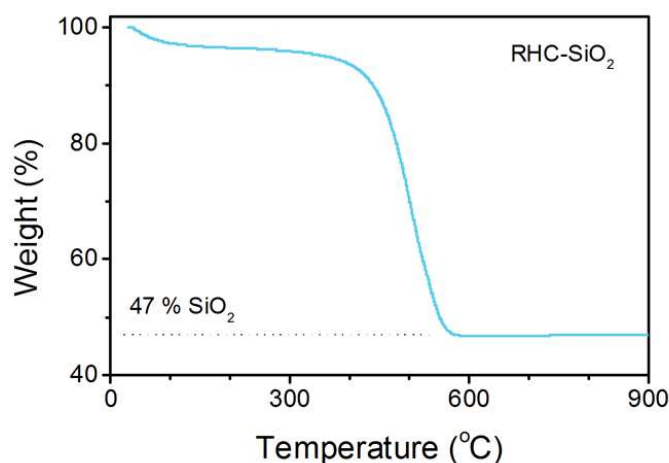

**Fig. S1.** TG of RHC-SiO<sub>2</sub> in O<sub>2</sub> atmosphere.

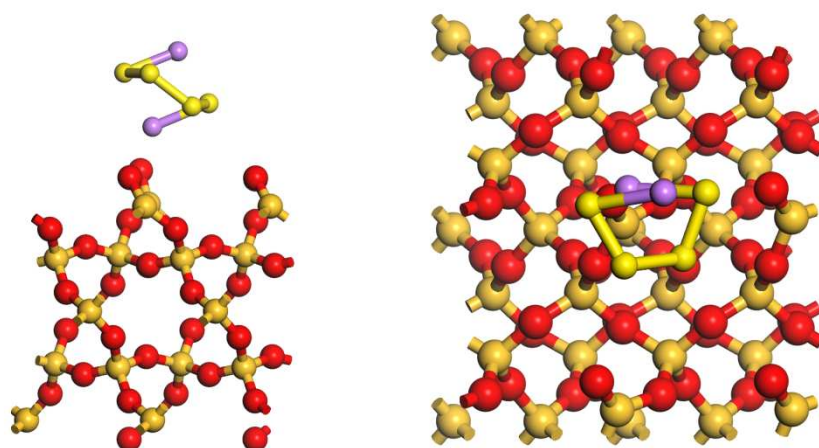

**Fig. S2.** The side view (left) and top view (right) of binding geometries a of a  $\text{Li}_2\text{S}_4$  on (110) plane of  $\text{SiO}_2$  with oxygen-terminated surface, which is derived from first-principle calculations based on densityfunctional theory.
